# Supplementary material for: A versatile ES cell-based melanoma mouse modeling platform
Source: bioRxiv or medRxiv preprint supplement (doi:10.1101/658260), 2019-08-31

**A**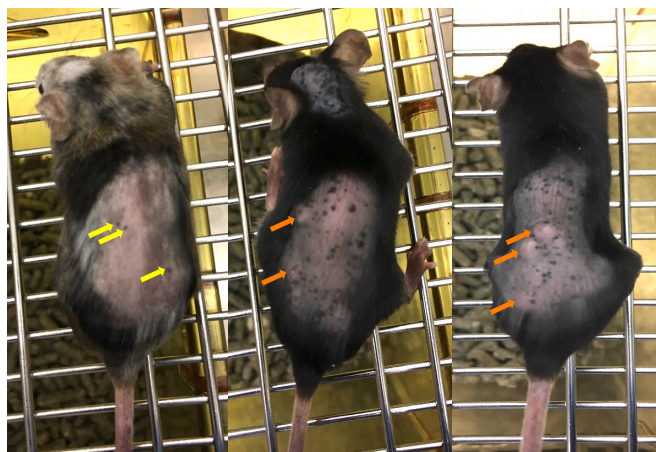**B**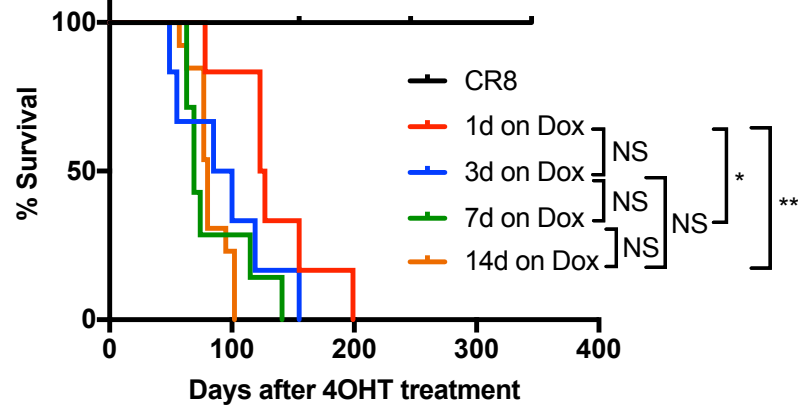**C**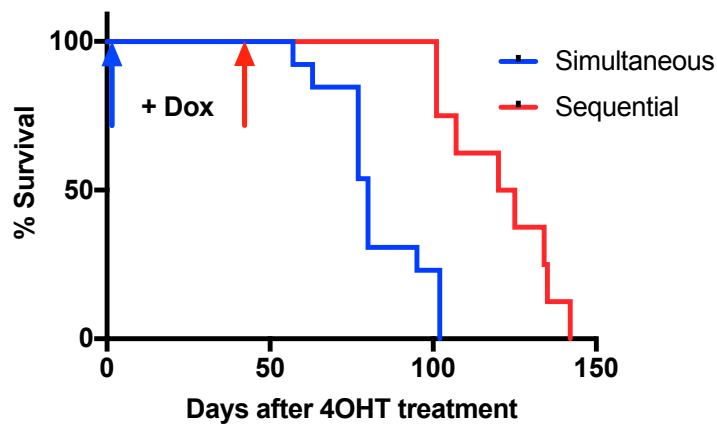**D**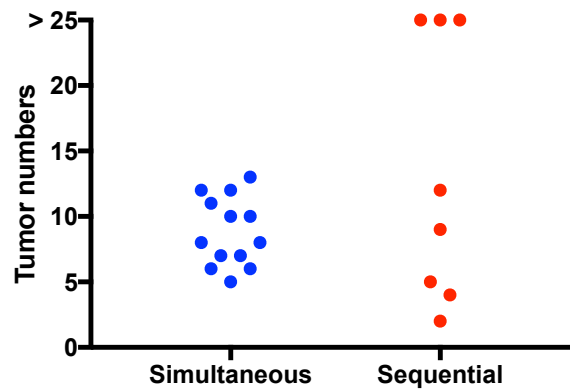

Supplement: Supplementary file [file media-7.pdf]
