# Supplementary material for: A versatile ES cell-based melanoma mouse modeling platform
Source: bioRxiv or medRxiv preprint supplement (doi:10.1101/658260), 2019-08-31

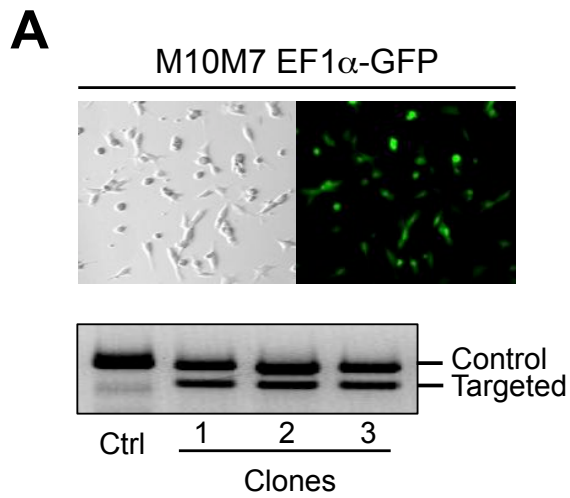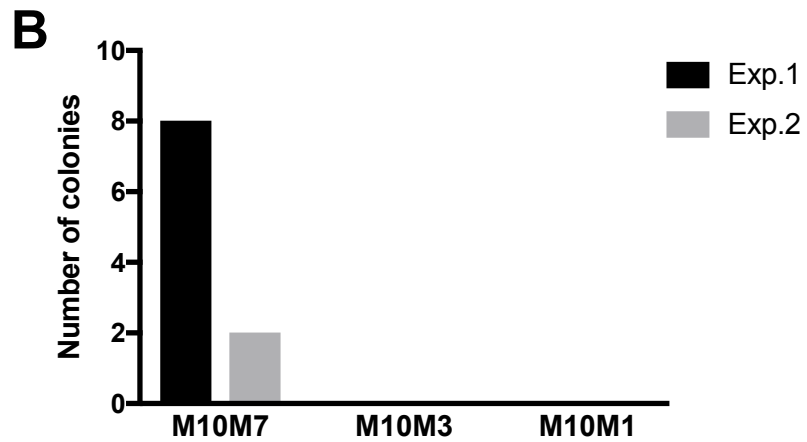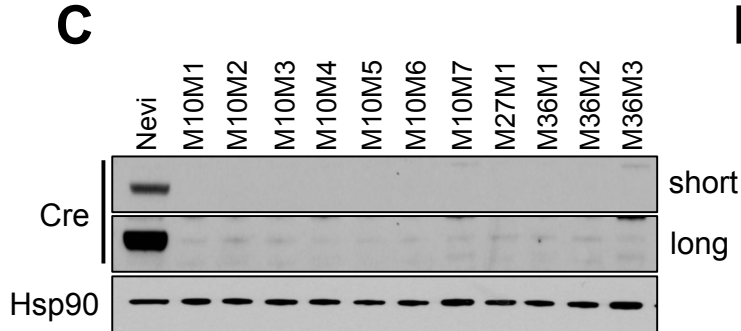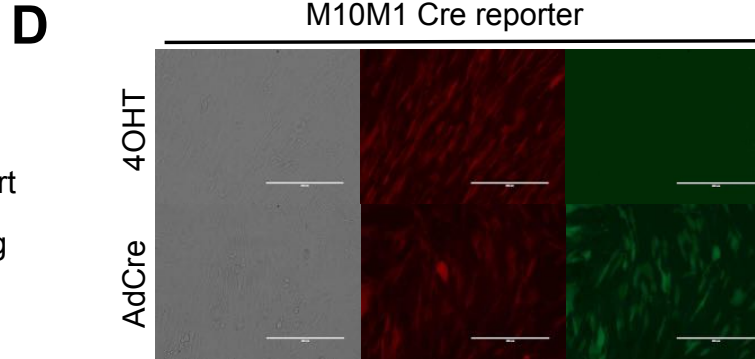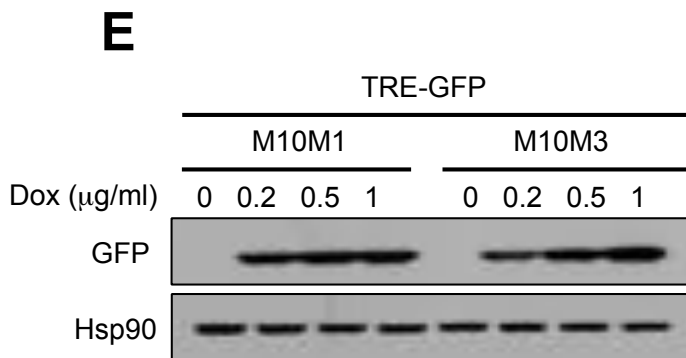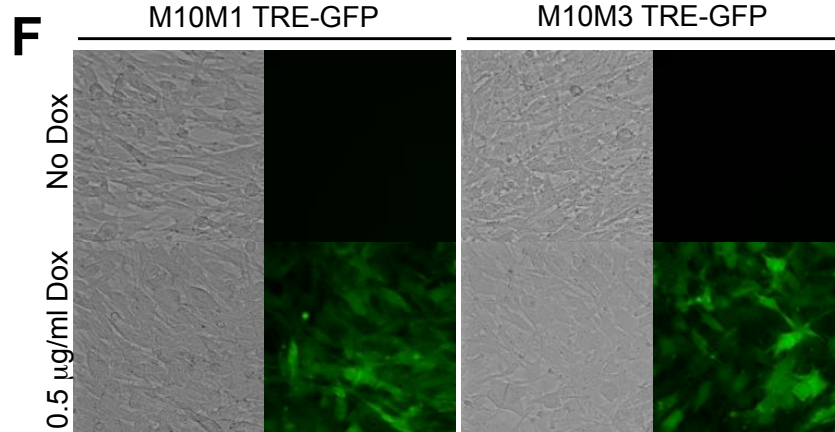

Supplement: Supplementary file [file media-12.pdf]
