# Supplementary material for: A versatile ES cell-based melanoma mouse modeling platform
Source: bioRxiv or medRxiv preprint supplement (doi:10.1101/658260), 2019-08-31
Supplement: Supplementary file [file media-14.pdf]

| ESC designation | ESC genotype                                                                                                                                 |
|-----------------|----------------------------------------------------------------------------------------------------------------------------------------------|
| B               | <b>Braf<sup>LSL-V600E/WT</sup>; Tyr-CreERT2<sup>TG/WT</sup>; Cags-LSL-rtTA3<sup>KI/WT</sup>; CHC<sup>KI/WT</sup></b>                         |
| N               | <b>Nras<sup>LSL-Q61R/WT</sup>; Tyr-CreERT2<sup>TG/WT</sup>; Cags-LSL-rtTA3<sup>KI/WT</sup>; CHC<sup>KI/WT</sup></b>                          |
| BP              | <b>Braf<sup>LSL-V600E/WT</sup>; Pten<sup>FL/WT</sup>; Tyr-CreERT2<sup>TG/WT</sup>; Cags-LSL-rtTA3<sup>KI/WT</sup>; CHC<sup>KI/WT</sup></b>   |
| BPP             | <b>Braf<sup>LSL-V600E/WT</sup>; Pten<sup>FL/FL</sup>; Tyr-CreERT2<sup>TG/WT</sup>; Cags-LSL-rtTA3<sup>KI/WT</sup>; CHC<sup>KI/WT</sup></b>   |
| NP              | <b>Nras<sup>LSL-Q61R/WT</sup>; Pten<sup>FL/WT</sup>; Tyr-CreERT2<sup>TG/WT</sup>; Cags-LSL-rtTA3<sup>KI/WT</sup>; CHC<sup>KI/WT</sup></b>    |
| NPP             | <b>Nras<sup>LSL-Q61R/WT</sup>; Pten<sup>FL/FL</sup>; Tyr-CreERT2<sup>TG/WT</sup>; Cags-LSL-rtTA3<sup>KI/WT</sup>; CHC<sup>KI/WT</sup></b>    |
| BC              | <b>Braf<sup>LSL-V600E/WT</sup>; Cdkn2a<sup>FL/WT</sup>; Tyr-CreERT2<sup>TG/WT</sup>; Cags-LSL-rtTA3<sup>KI/WT</sup>; CHC<sup>KI/WT</sup></b> |
| BCC             | <b>Braf<sup>LSL-V600E/WT</sup>; Cdkn2a<sup>FL/FL</sup>; Tyr-CreERT2<sup>TG/WT</sup>; Cags-LSL-rtTA3<sup>KI/WT</sup>; CHC<sup>KI/WT</sup></b> |
| NC              | <b>Nras<sup>LSL-Q61R/WT</sup>; Cdkn2a<sup>FL/WT</sup>; Tyr-CreERT2<sup>TG/WT</sup>; Cags-LSL-rtTA3<sup>KI/WT</sup>; CHC<sup>KI/WT</sup></b>  |
| NCC             | <b>Nras<sup>LSL-Q61R/WT</sup>; Cdkn2a<sup>FL/FL</sup>; Tyr-CreERT2<sup>TG/WT</sup>; Cags-LSL-rtTA3<sup>KI/WT</sup>; CHC<sup>KI/WT</sup></b>  |
| PP              | <b>Pten<sup>FL/FL</sup>; Tyr-CreERT2<sup>TG/WT</sup>; Cags-LSL-rtTA3<sup>KI/WT</sup>; CHC<sup>KI/WT</sup></b>                                |
| CC              | <b>Cdkn2a<sup>FL/FL</sup>; Tyr-CreERT2<sup>TG/WT</sup>; Cags-LSL-rtTA3<sup>KI/WT</sup>; CHC<sup>KI/WT</sup></b>                              |
