# Supplementary material for: A versatile ES cell-based melanoma mouse modeling platform
Source: bioRxiv or medRxiv preprint supplement (doi:10.1101/658260), 2019-08-31
Supplement: Supplementary file [file media-15.pdf]

## Genotyping primers

### ***LSL-Braf V600E***

BRAF<sub>geno F</sub>: ACTTTCATAGTCTAAGGGAGTTTGT

BRAF<sub>geno R</sub>: CAAGATTCCTCTCCCAGCCG

WT: 300 bp, Mut: 230 bp; Primers Ratio 1:1

### ***LSL-NrasQ61R***

Nras-1: AGACGCGGAGACTTGCGGAGC

Nras-2: GCTGGATCGTCAAGGCGCTTTTCC

GENO2: GCAAGAGGCCCGGCAGTACCTA

WT: 487bp TG: 371 bp; Primer Ratio 1:1:1

### ***PTEN Flox***

PTEN <sub>genoF</sub>: CAAGCACTCTGCGAACTGAG

PTEN <sub>genoR</sub>: AAGTTTTTGAAGGCAAGATGC

WT: 160 bp Mut: 340 bp; Primer Ratio 1:1

### ***CDKN2A Flox***

CDKN2a <sub>genoFnew</sub>: CCTGACTATGGTAGTAAAGTGG

CDKN2a <sub>genoRnew</sub>: ACGTGTATGCCACCCTGACC

WT: 290 bp TG: 360 bp; Primer Ratio 1:1

### ***CHC***

C2 new 1: AATCATCCCAGGTGCACAGCATTGCGG

C2 new 2: CTTTGAGGGCTCATGAACCTCCCAGG

C2 new 6: GACGGCAATTTTCGATGATG

WT: 250bp TG: 400bp; Primer Ratio 1:1:1

### ***Cags-LSL-rtTA3 (rosa26 knock-in)***

Rosa A: AAAGTCGCTCTGAGTTGTTAT

Rosa B: GCGAAGAGTTTGTCCCTCAACC

Rosa C: CCTCCAATTTTACACCTGTTC

WT: 297bp TG: 350bp; Primer Ratio 2:1:2

### ***Tyrosinase-CreERt2***

CRE26: CCTGGAAAATGCTTCTGTGCG

CRE36: CAGGGTGTTATAAGCAATCCC

GABRA12: CAATGGTAGGCTCACTCTGGGAGATGATA

GABRA70: AACACACACTGGCAGGACTGGCTAGG

Cre: 400bp internal control: 300bp; Ratio 1:1:1:1

### ***CHC Targeted ESC***

PGK F: GAGCAGCTGAAGCTTATGGA

Hygro R: CTGAATTCCCCAATGTCAAG

oIMR7778: TATACTCAGAGCCGGCCT

oIMR7777: ACAGCGTGGTGGTACCTTAT  
Targeted: 300bp internal control: 450bp; Primer Ratio 1:1:1:1

***Recombination of Braf exon 3 and 14 in ESC***

X3 F: CATGGCTTGAGTAAGTCTGC  
X3 R: GATTCACATGGGACCTGAAC  
X14 F: CTACCTAGTGAGACCATATCTC  
X14 R: CAACAGTTGGATCCGTTTAAACG  
WT: 400bp+250bp Recombined: 150bp; Primer Ratio 1.5:1

T7 assay primers

Pten Forward: CAGTCTCTGCAACCATCCAG  
Pten Reverse: ATCTCATCTACACCCTAGAT

SYBR Green primers

rtTA3  
Forward: TGACGACAAGGAAACTCGCT  
Reverse: GGGGCAGAAGTGGGTATGAT  
Product 134 bp

Mouse  $\beta$ -actin  
Forward: TTGCTGACAGGATGCAGAAG  
Reverse: ACATCTGCTGGAAGGTGGAC  
Product 102 bp
